# Supplementary material for: Identification by shape-based virtual screening and evaluation of new tyrosinase inhibitors
Source: PeerJ. 2018 Jan 26;6:e4206. doi: 10.7717/peerj.4206 (PMC5788061; doi:10.7717/peerj.4206)
Supplement: Supplemental Information 1 [file peerj-06-4206-s001.xlsx]

## Sheet: Sheet1
Tyr-inhibitory rate of compounds under 10 μM (%)
3253-1775			5186-0429			6944-0074			F543-0002			G611-1034			D715-1019			8019-7511			C301-9474			C301-8976			3020-5131			3720-3263			8629-0200			Y041-3263
Mean	SD	N	Mean	SD	N	Mean	SD	N	Mean	SD	N	Mean	SD	N	Mean	SD	N	Mean	SD	N	Mean	SD	N	Mean	SD	N	Mean	SD	N	Mean	SD	N	Mean	SD	N	Mean	SD	N
44.56	3.64	3	83.1933	2.55	3	-9.95667	1.01	3	14.4533	0.88	3	-0.463333	0.1	3	1.86333	0.12	3	20.3033	2.88	3	18.8933	2.01	3	-4.17	0.22	3	-10.19	1.84	3	43.7367	3.55	3	5.87333	0.57	3	-0.52	0.08	3
Dopa-inhibitory rate of compounds under 10 μM (%)
3253-1775			5186-0429			6944-0074			F543-0002			G611-1034			D715-1019			8019-7511			C301-9474			C301-8976			3020-5131			3720-3263			8629-0200			Y041-3263
Mean	SD	N	Mean	SD	N	Mean	SD	N	Mean	SD	N	Mean	SD	N	Mean	SD	N	Mean	SD	N	Mean	SD	N	Mean	SD	N	Mean	SD	N	Mean	SD	N	Mean	SD	N	Mean	SD	N
-11.6267	1.22	3	48.23	2.89	3	-11.83	1.15	3	-2.75333	0.21	3	-0.677667	0.11	3	1.70533	0.26	3	10.0833	2.01	3	3.41	0.41	3	11.4167	2.74	3	5.54333	0.63	3	-7.54	0.89	3	4.65667	0.51	3	14.25	2.16	3
