# Supplementary material for: Identification by shape-based virtual screening and evaluation of new tyrosinase inhibitors
Source: PeerJ. 2018 Jan 26;6:e4206. doi: 10.7717/peerj.4206 (PMC5788061; doi:10.7717/peerj.4206)
Supplement: Supplemental Information 2 [file peerj-06-4206-s002.xlsx]

## Sheet: Sheet1
The inhibitory effects of 5186-0429 on tyrosinase
	5186-0429-Tyr			5186-0429-Dopa
-11	100	100	100	100	100	100
-9	91.6667	99	96.1165	90.3955	91.4286	89.6342
-8	91.6667	95.0385	89.3204	81.9209	78.8571	85.9756
-7	91.6667	93.1923	89.3204	80.226	78	85.3658
-6	83.1852	76.9231	78.6408	66.6667	66.8571	69.5122
-5	37.037	38.2692	34.9515	48.0226	40	43.9024
-4	24.0741	22.1154	19.3548	35.0877	38.3233	42.1559
